# Supplementary material
Source: MDPI journal article supplement (https://www.mdpi.com/2071-1050/13/24/13692)
Supplement: s1 [file s1]

Archive with 2 entries (2 files):
- Supplementary S2.pdf
- Supplementary Table S1.pdf
